# Supplementary material
Source: ML conference proceedings conference paper supplement (https://openreview.net/forum?id=HwxEI3u5Ui)

Intra-Cluster MI

0.11  
0.10  
0.09  
0.08  
0.07  
0.06  
0.05

1e-3

2e-3

3e-3

4e-3

Inter-Cluster MI

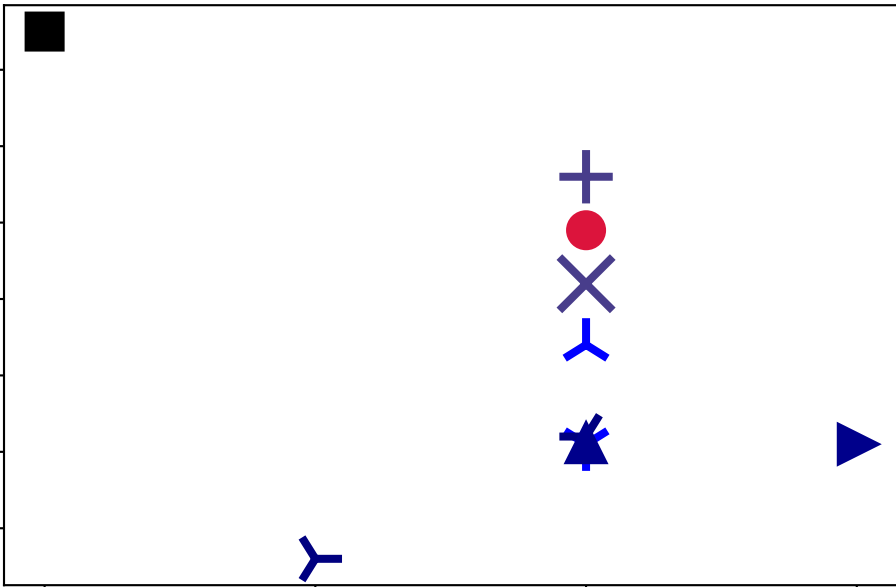

Supplement: supplementary_material [file attachment]

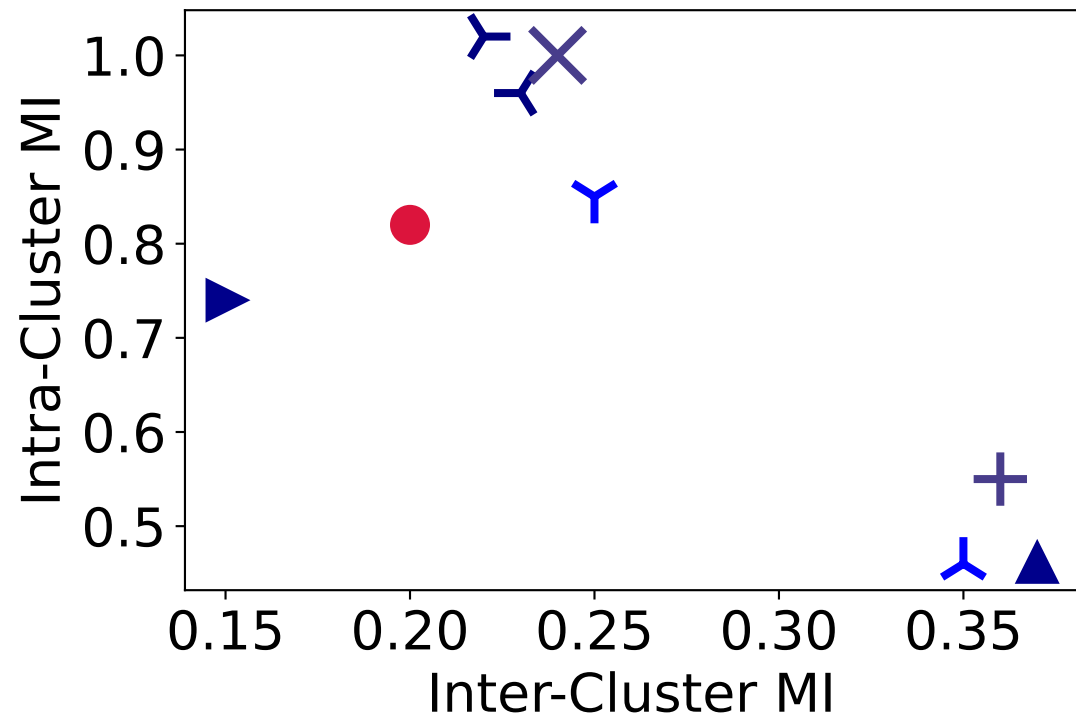

Supplement: supplementary_material [file attachment]

Intra-Cluster MI

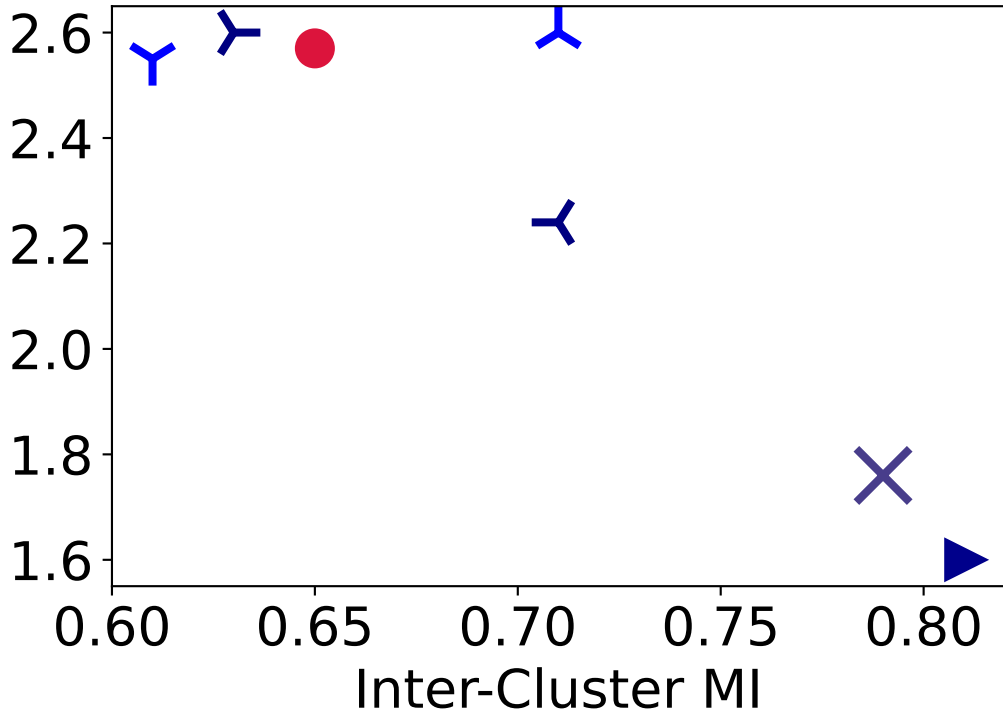

Supplement: supplementary_material [file attachment]

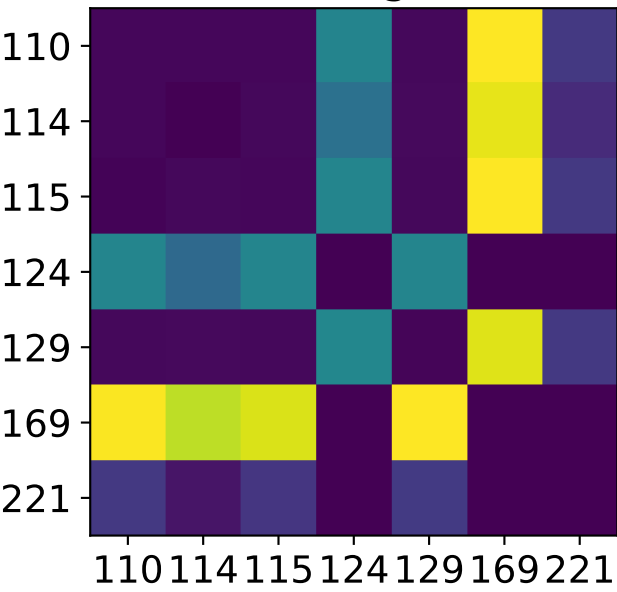

Supplement: supplementary_material [file attachment]

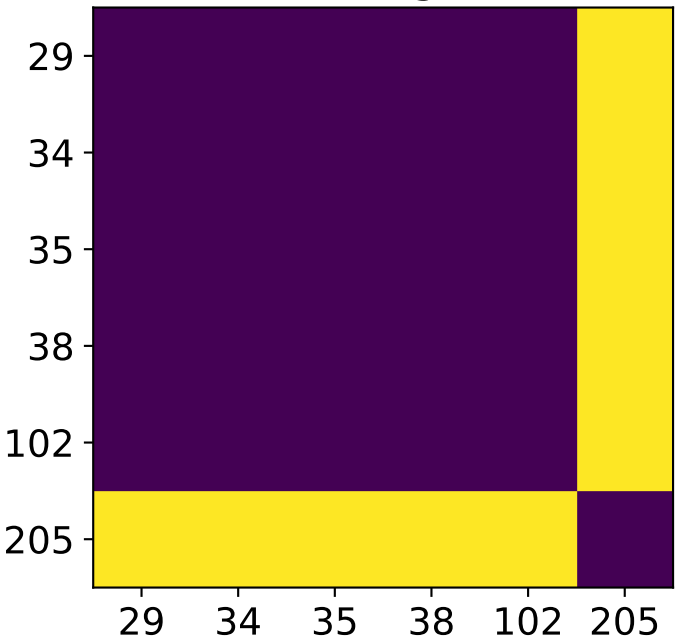

Supplement: supplementary_material [file attachment]

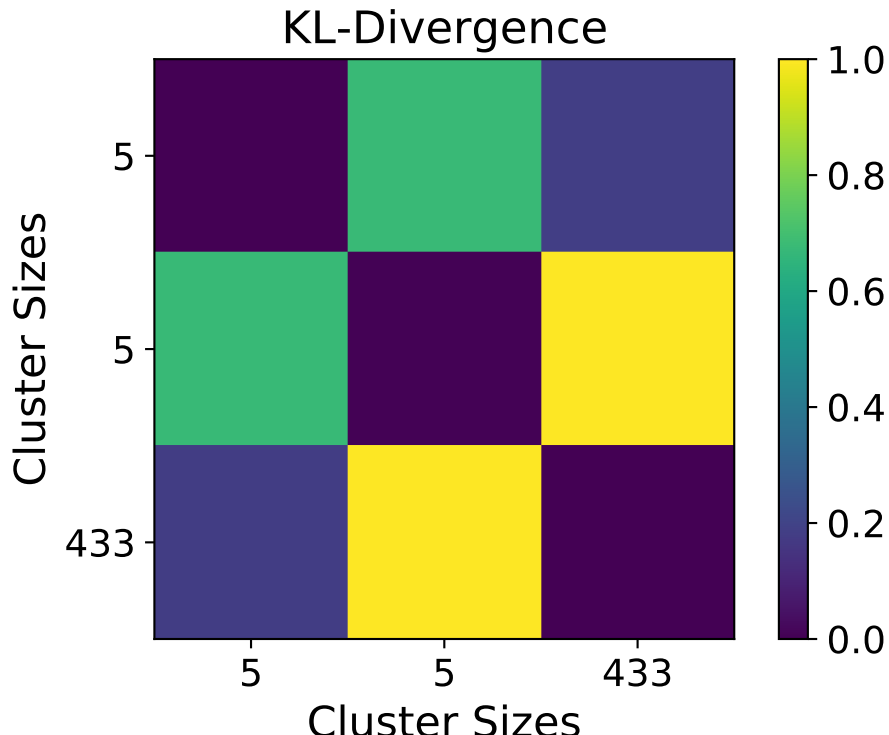

Supplement: supplementary_material [file attachment]

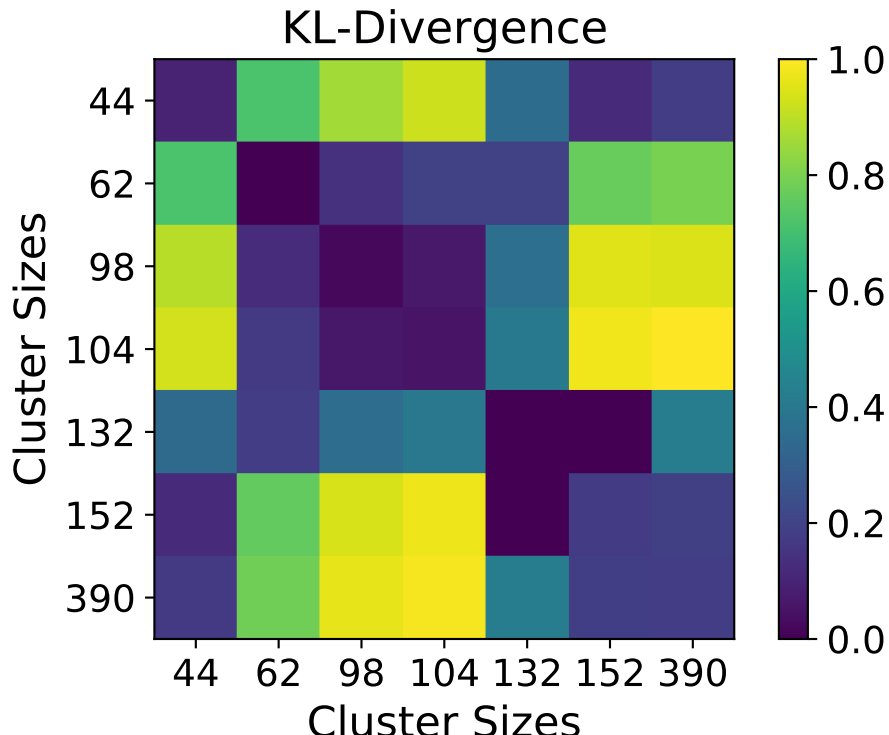

Supplement: supplementary_material [file attachment]

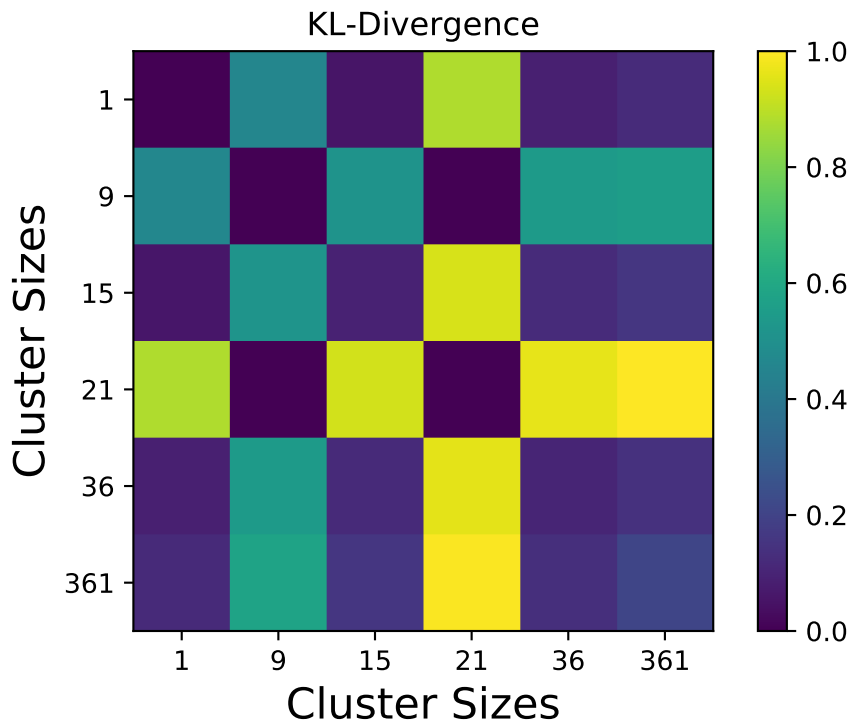

Supplement: supplementary_material [file attachment]

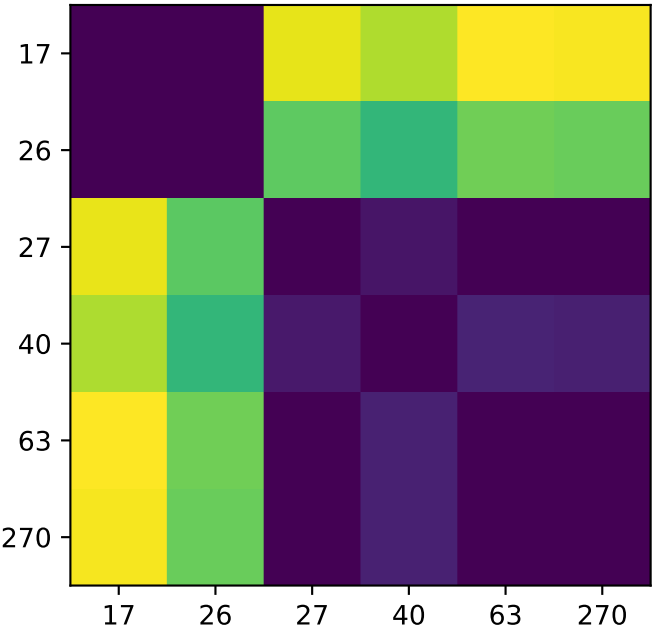

Supplement: supplementary_material [file attachment]

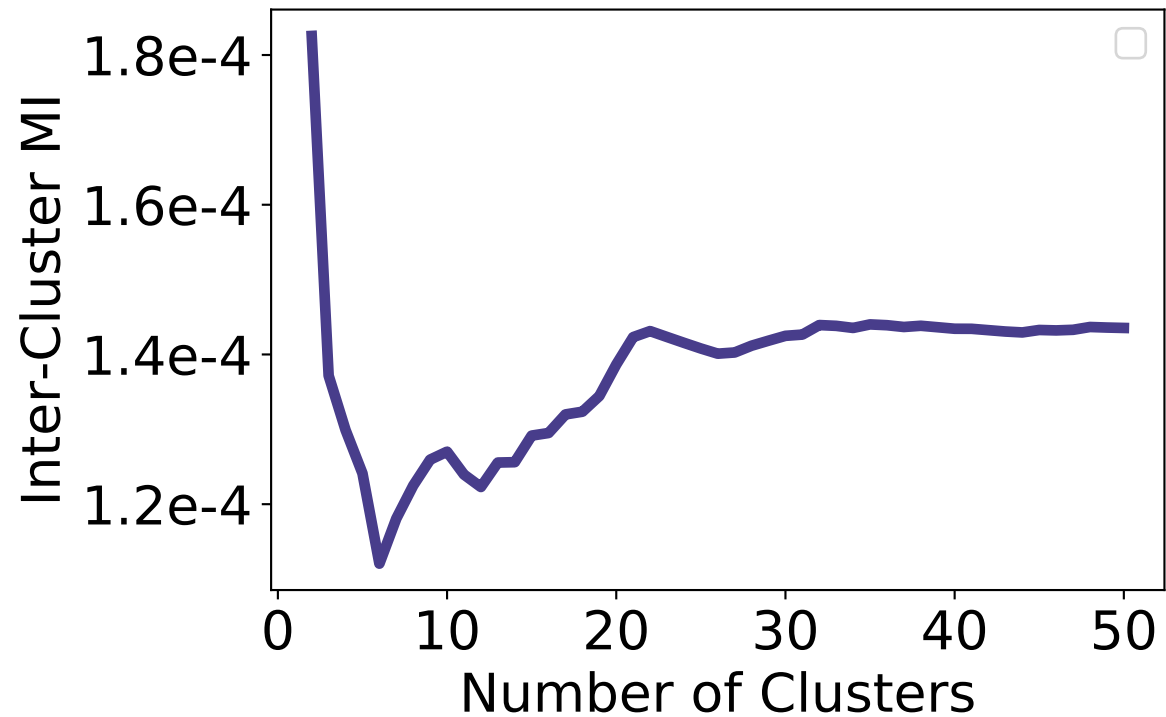

Supplement: supplementary_material [file attachment]

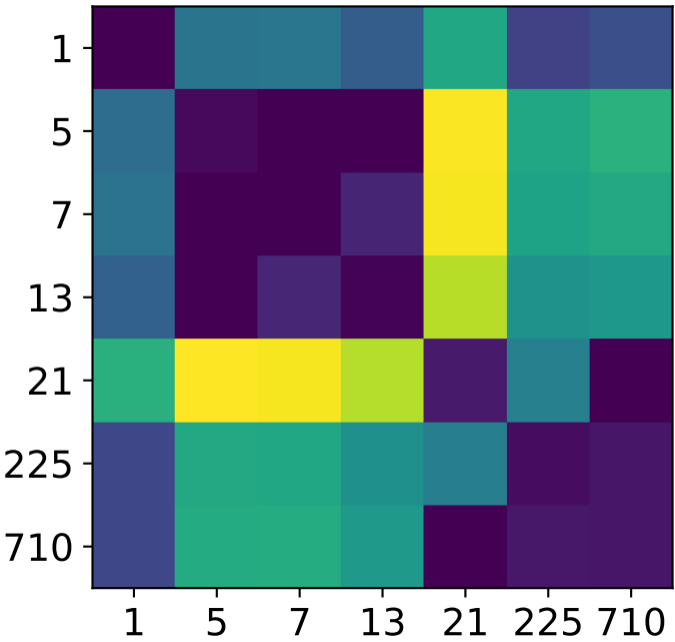

Supplement: supplementary_material [file attachment]

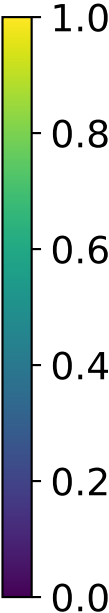

Supplement: supplementary_material [file attachment]

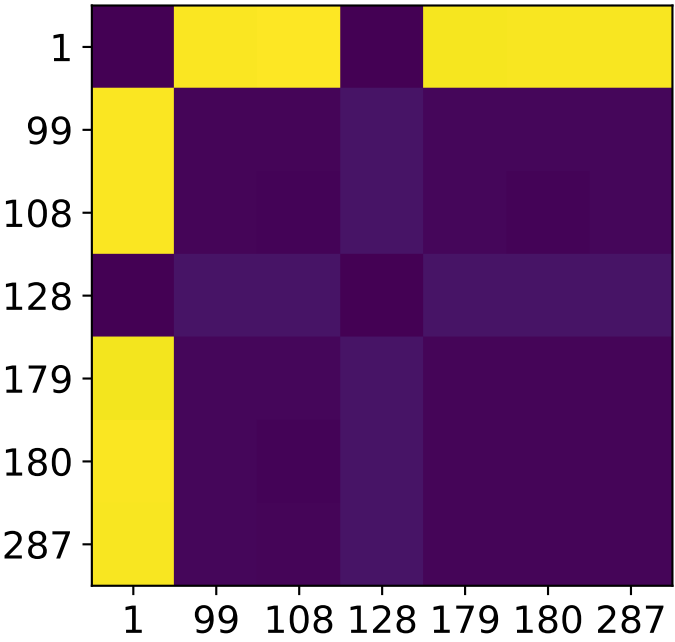

Supplement: supplementary_material [file attachment]

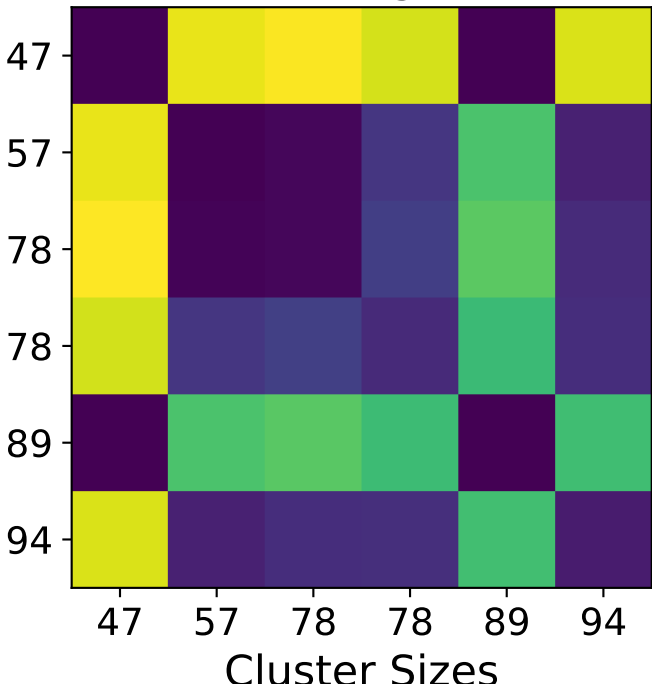

Supplement: supplementary_material [file attachment]

Inter-Cluster MI

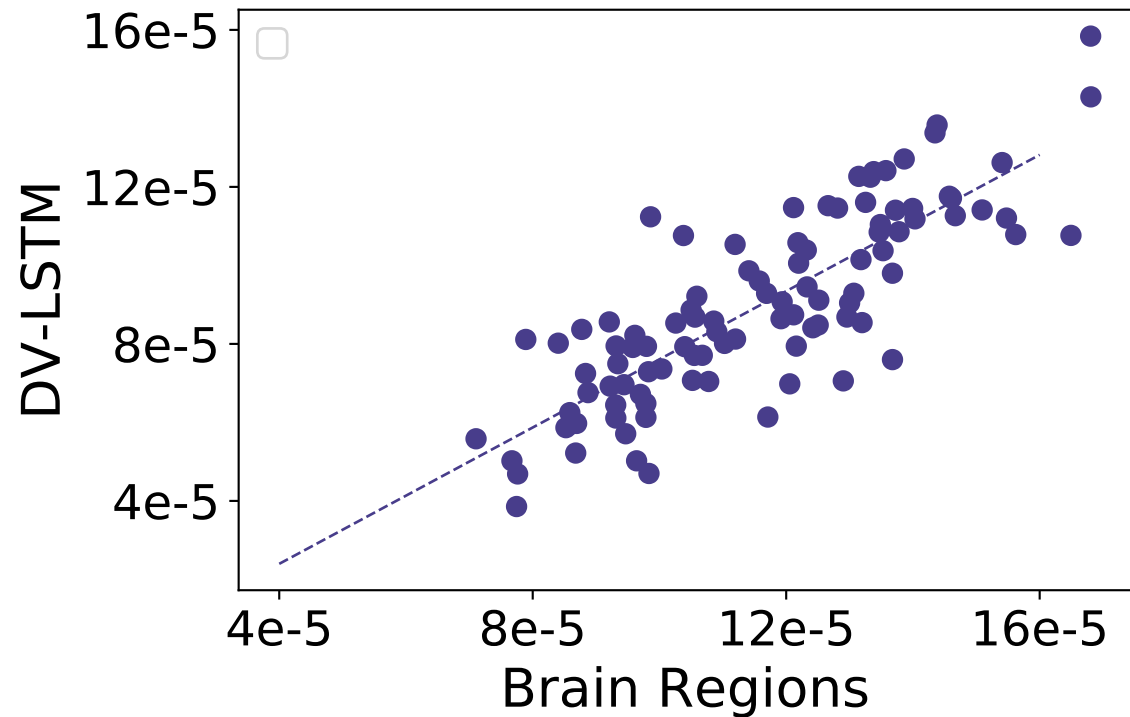

Supplement: supplementary_material [file attachment]

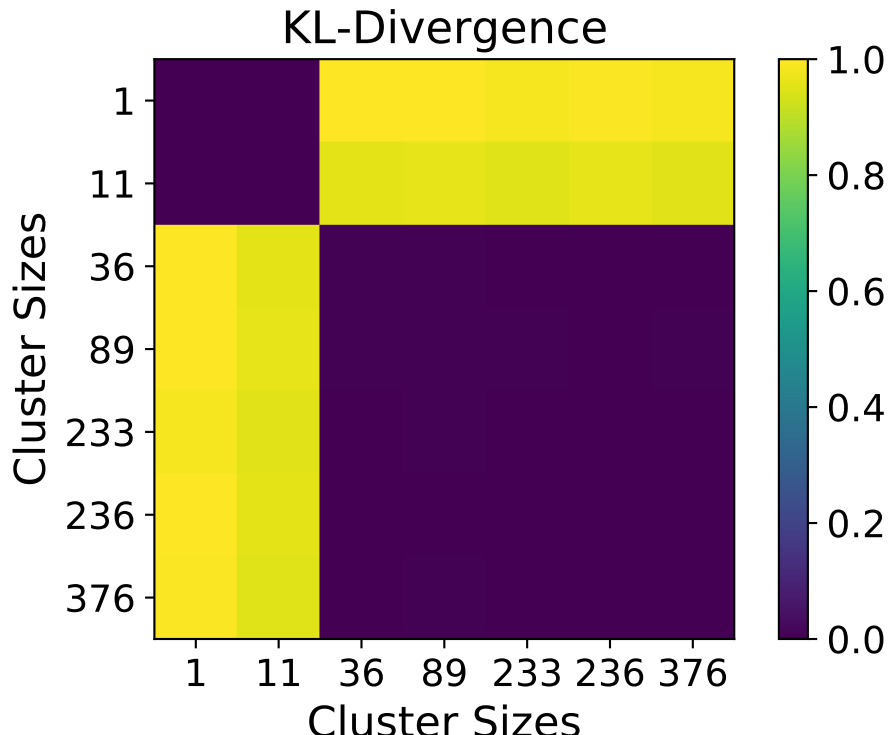

Supplement: supplementary_material [file attachment]

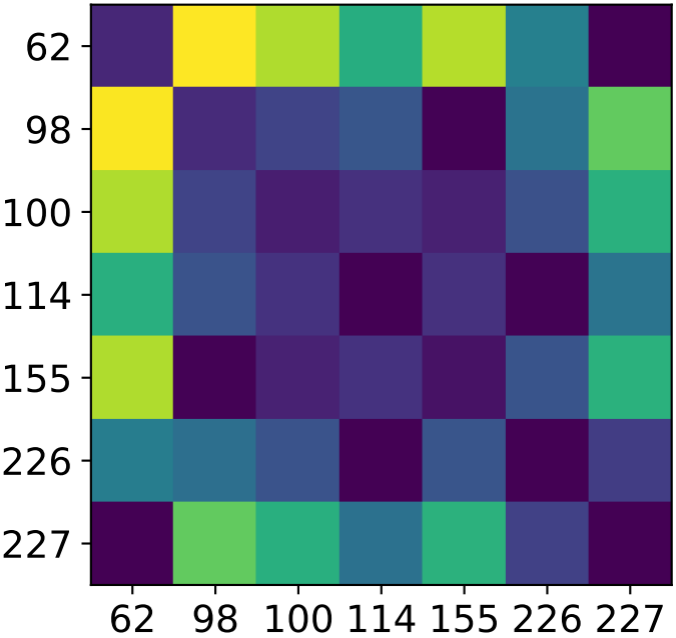

Supplement: supplementary_material [file attachment]

Intra-Cluster MI

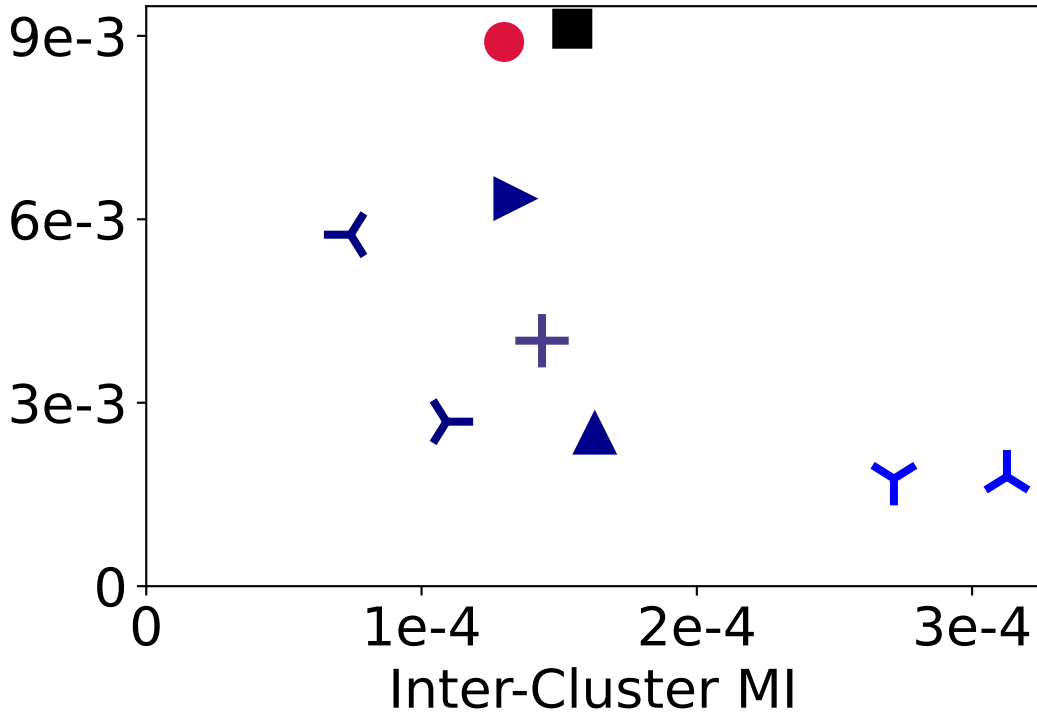

Supplement: supplementary_material [file attachment]

Intra-Cluster MI

0.11  
0.10  
0.09  
0.08  
0.07  
0.06  
0.05

0.001

0.002

0.003

0.004

Inter-Cluster MI

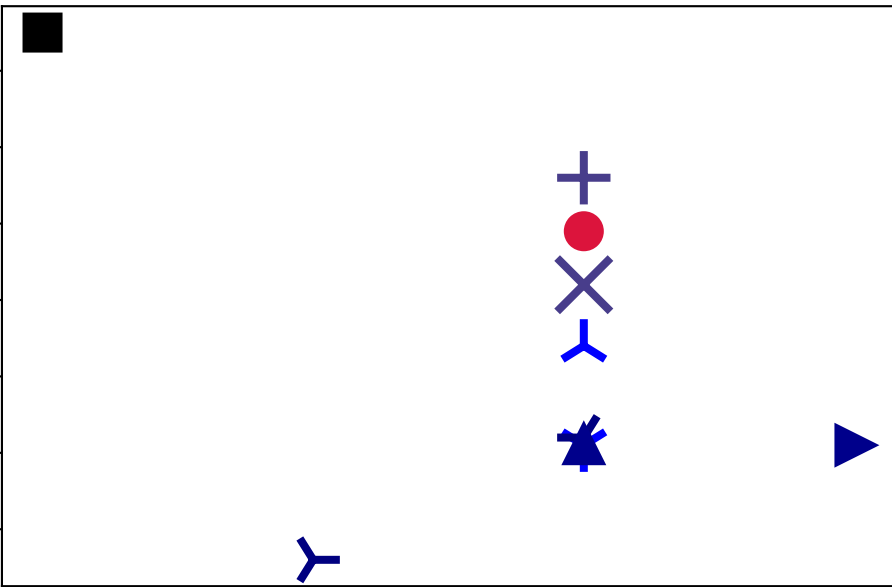

Supplement: supplementary_material [file attachment]

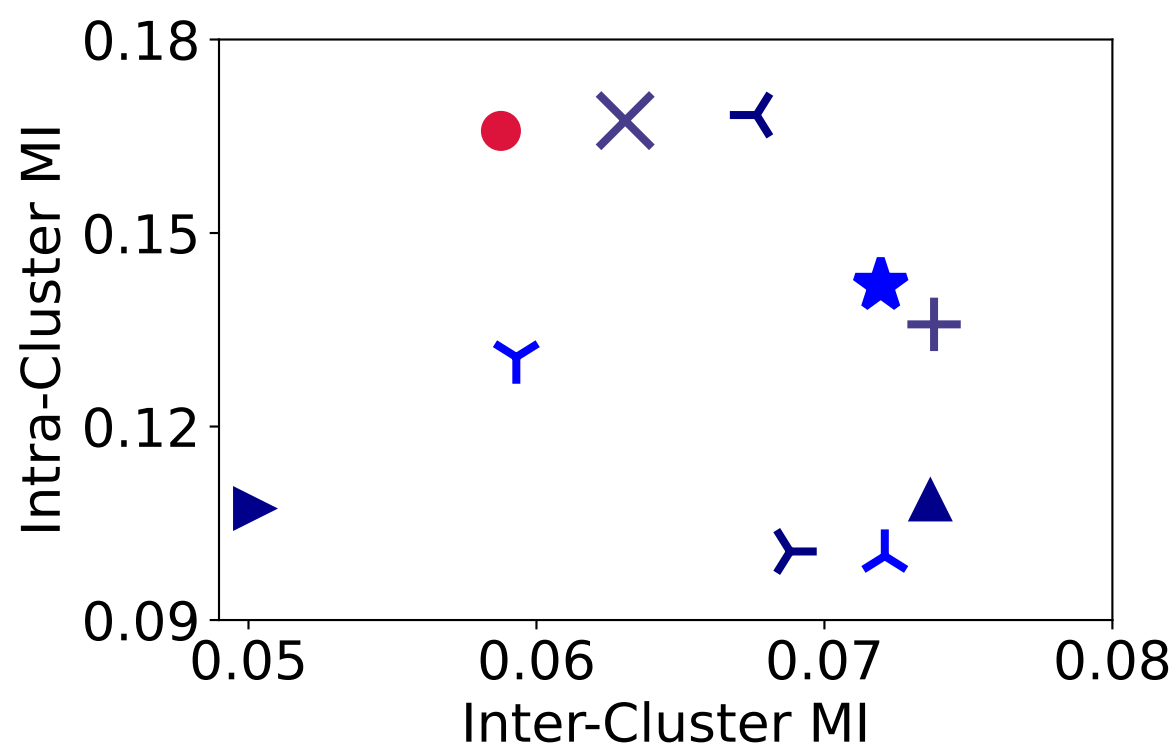

Supplement: supplementary_material [file attachment]

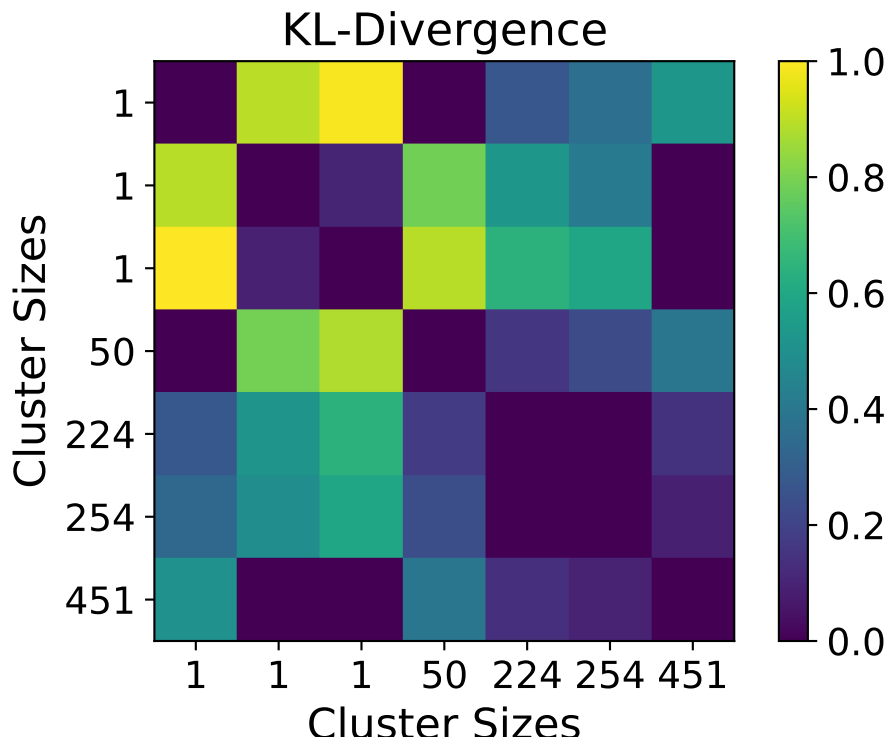

Supplement: supplementary_material [file attachment]

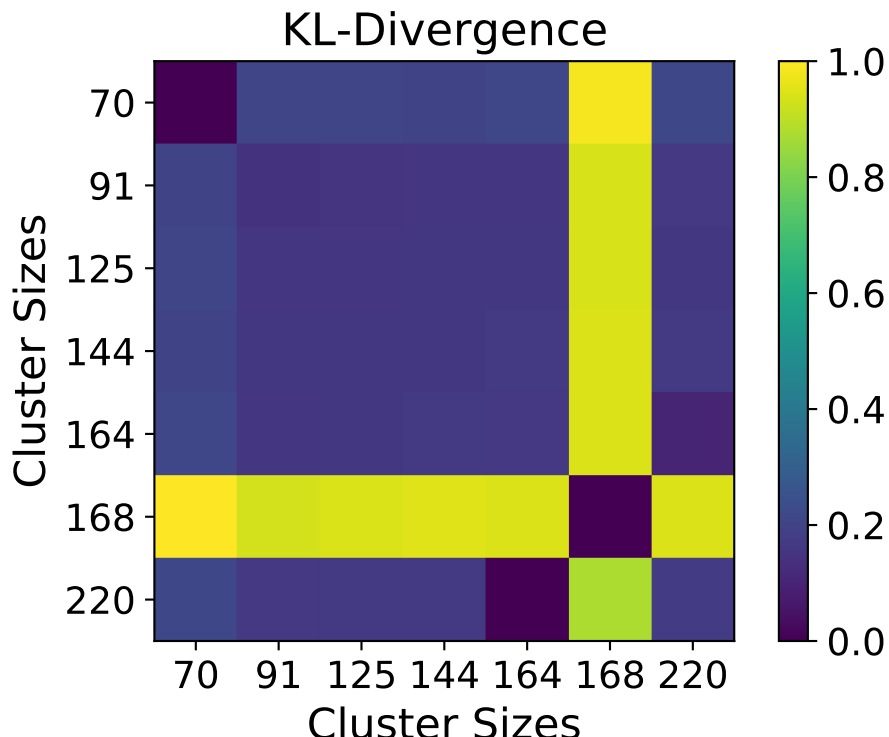

Supplement: supplementary_material [file attachment]

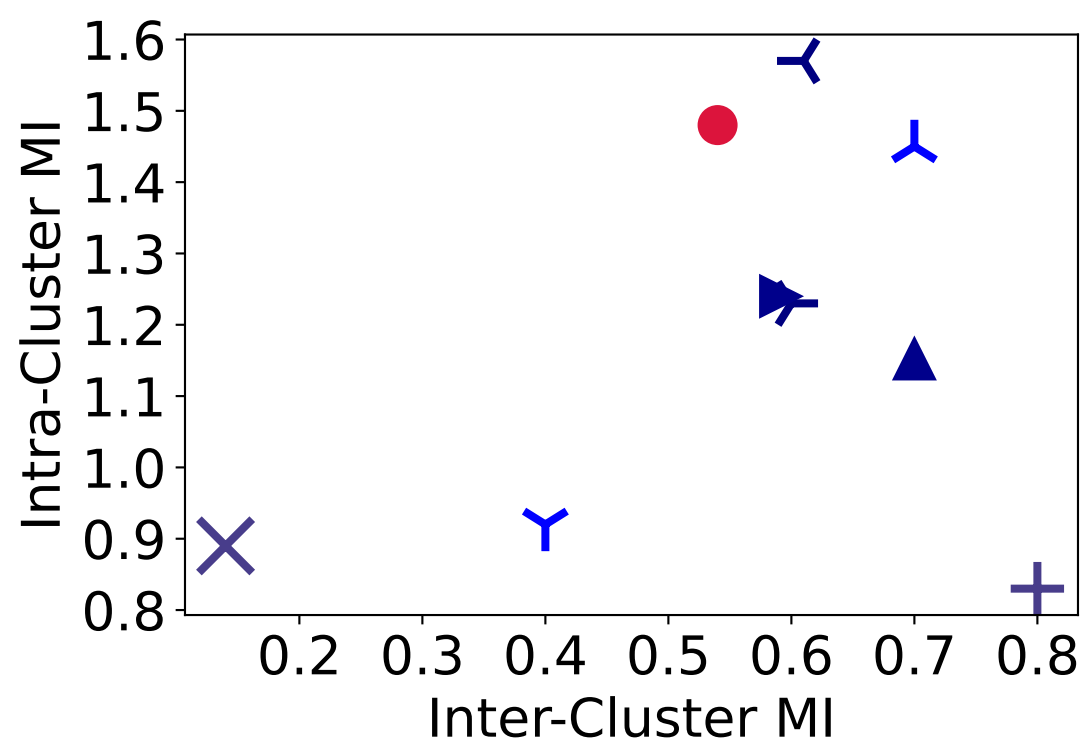

Supplement: supplementary_material [file attachment]

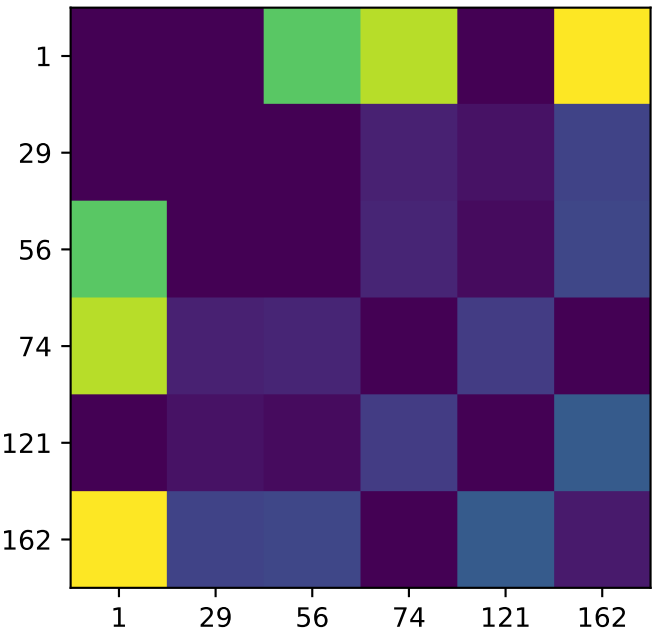

Supplement: supplementary_material [file attachment]

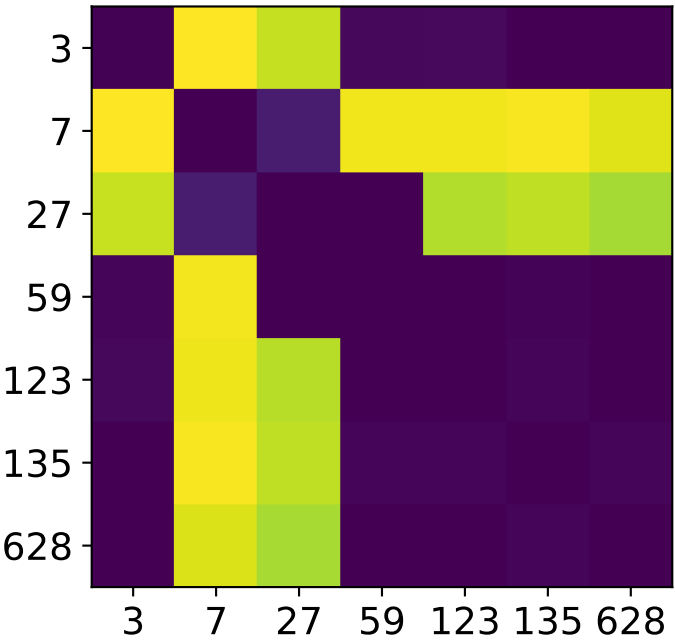

Supplement: supplementary_material [file attachment]

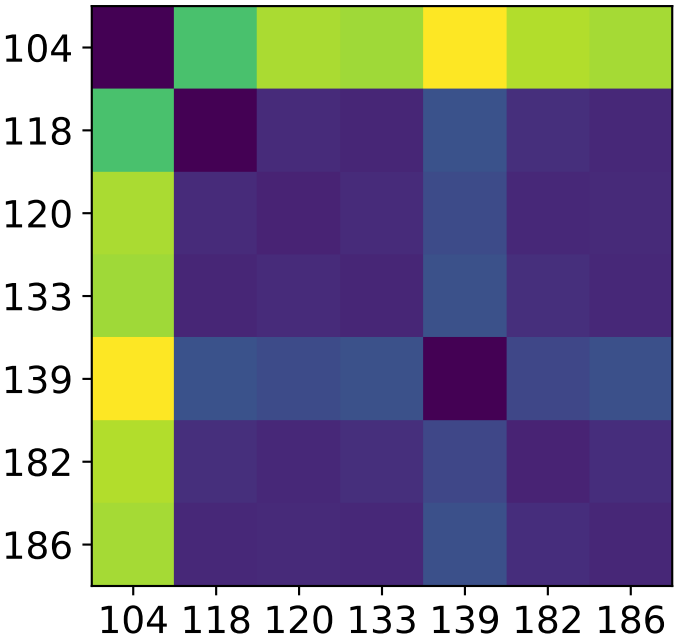

Supplement: supplementary_material [file attachment]

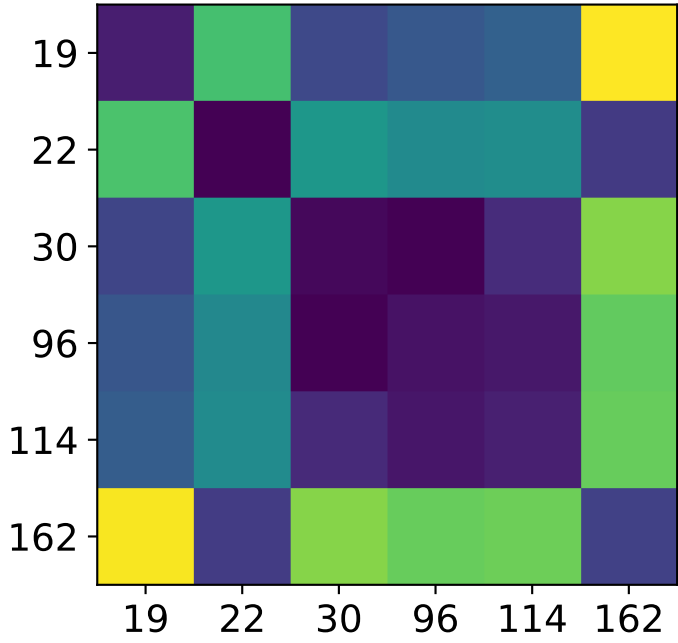

Supplement: supplementary_material [file attachment]

# Intra-Cluster MI

DV-LSTM

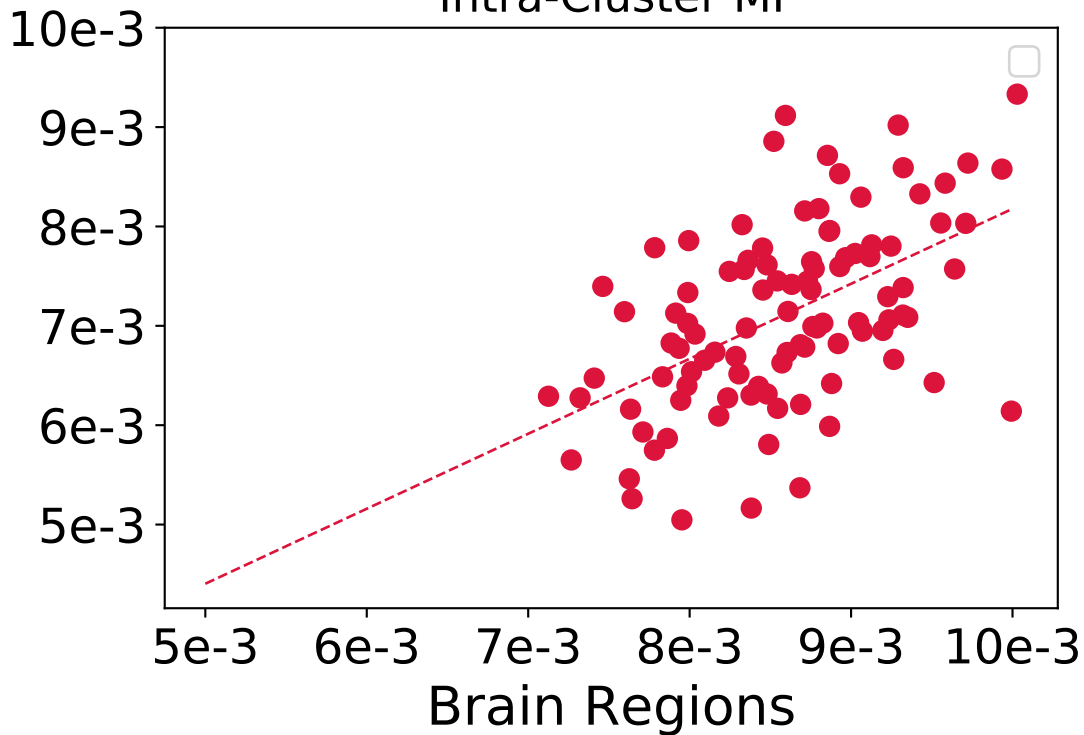

Supplement: supplementary_material [file attachment]

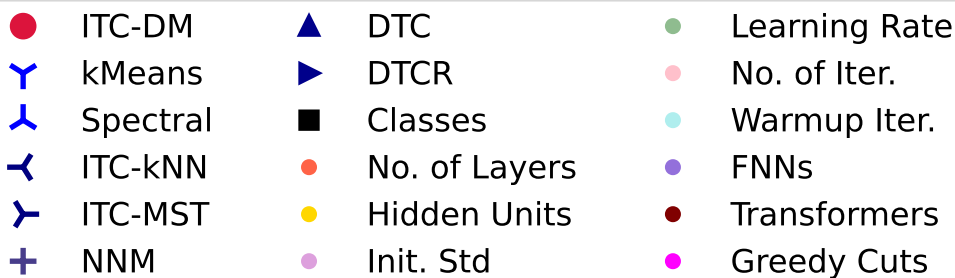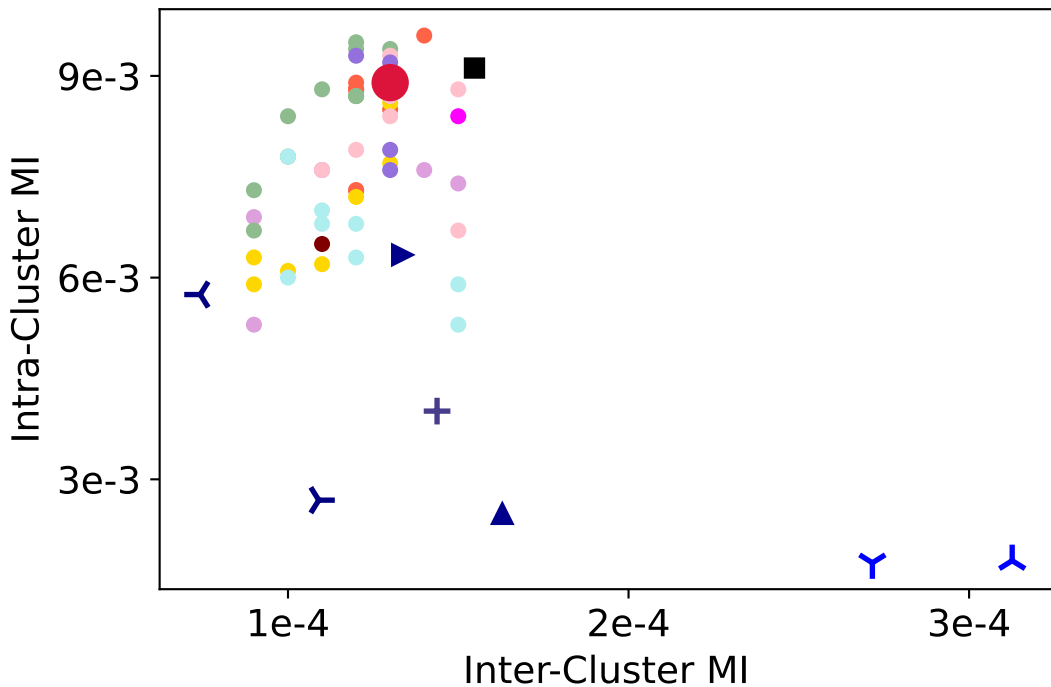

Supplement: supplementary_material [file attachment]

KL-Divergence

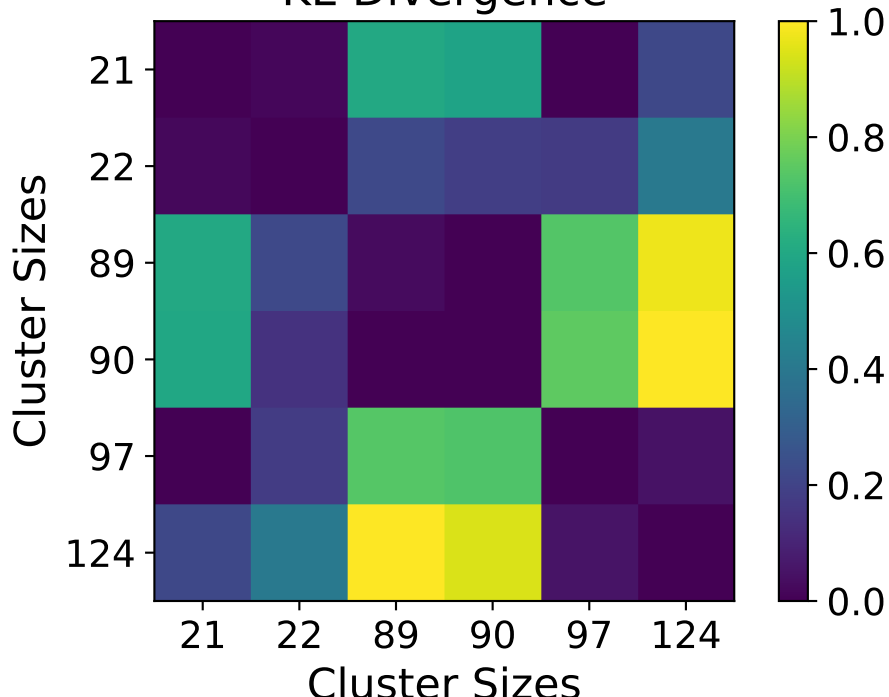

Supplement: supplementary_material [file attachment]

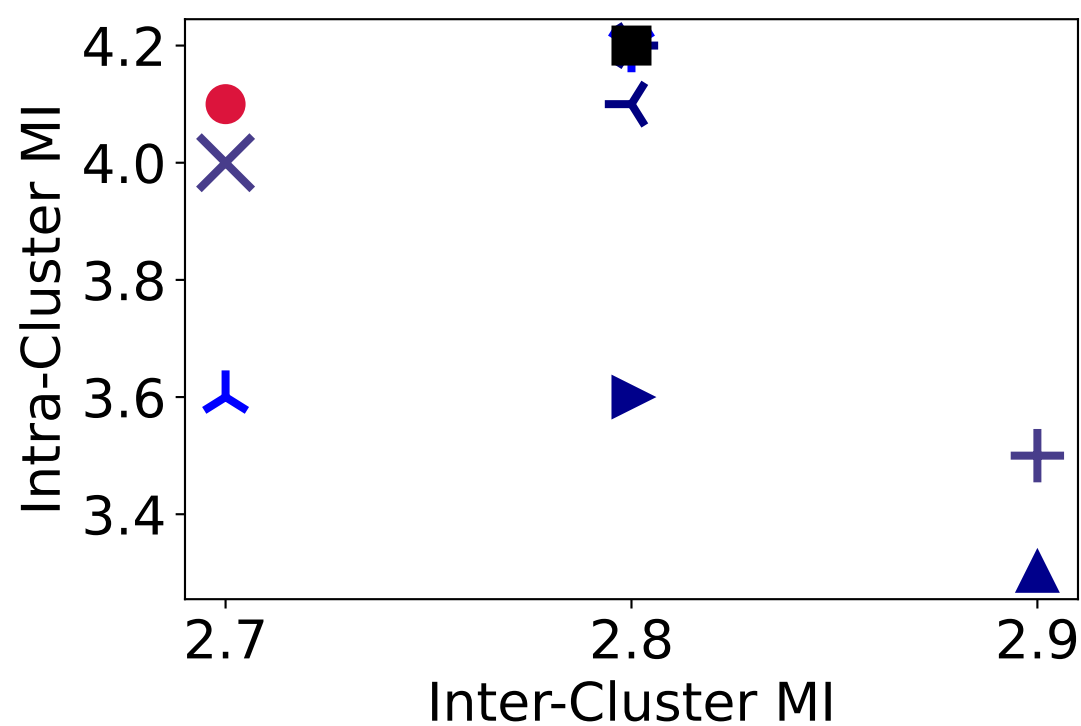

Supplement: supplementary_material [file attachment]

Intra-Cluster MI

3.6  
3.4  
3.2  
3.0  
2.8  
2.6

1.7 1.8 1.9 2.0 2.1 2.2 2.3 2.4 2.5

Inter-Cluster MI

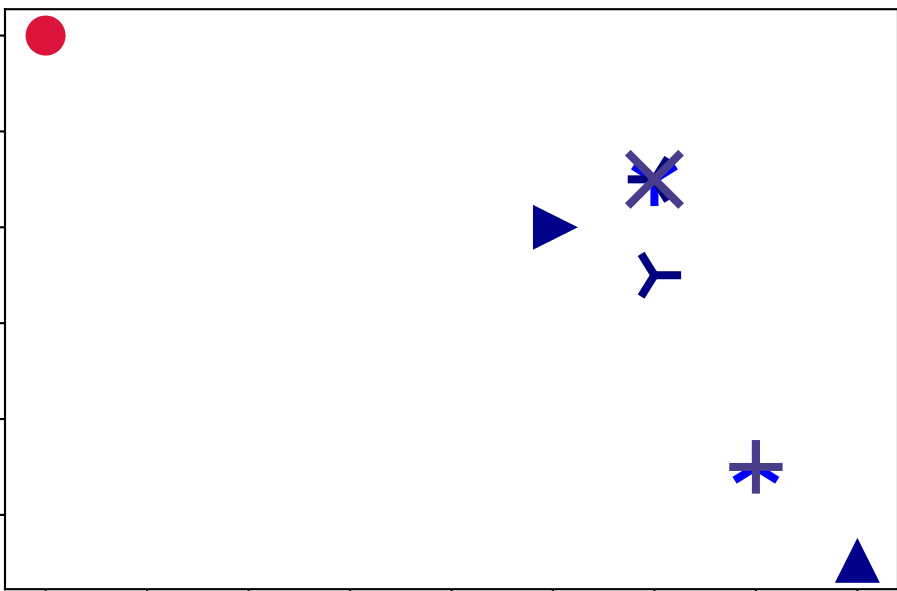

Supplement: supplementary_material [file attachment]

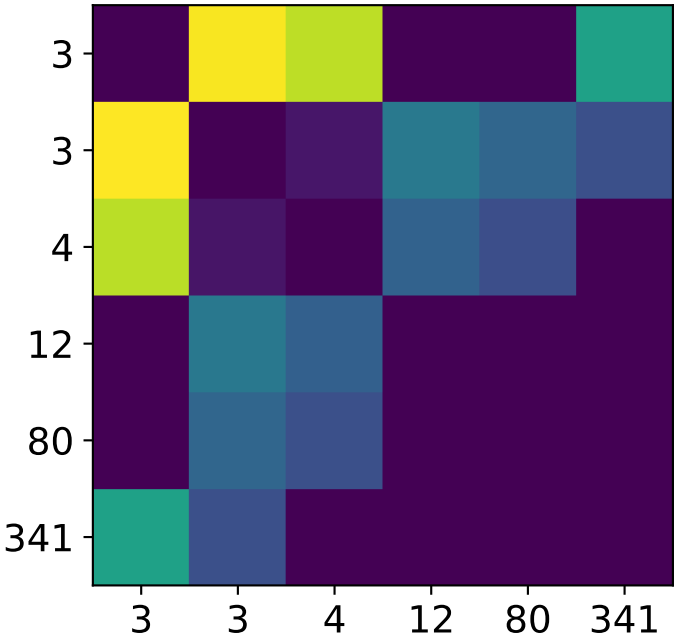

Supplement: supplementary_material [file attachment]

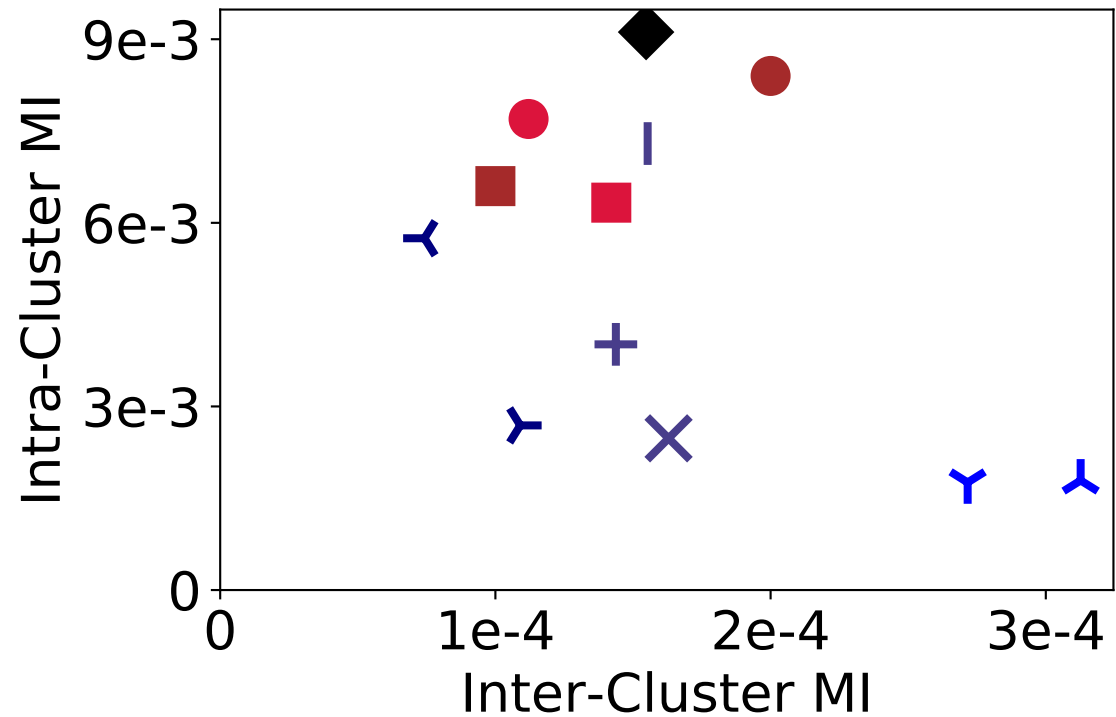

Supplement: supplementary_material [file attachment]

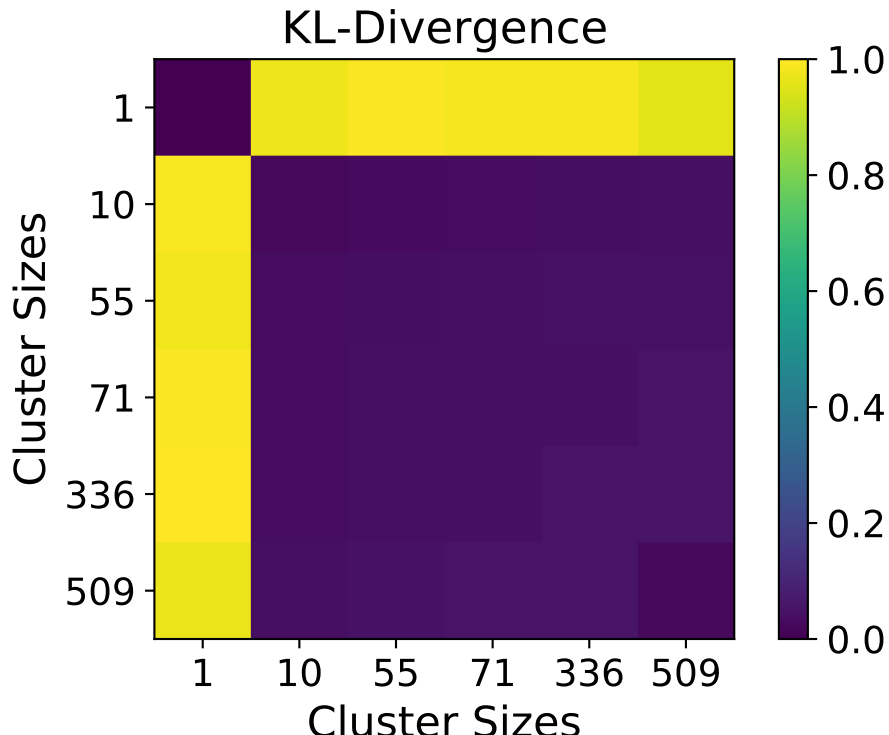

Supplement: supplementary_material [file attachment]

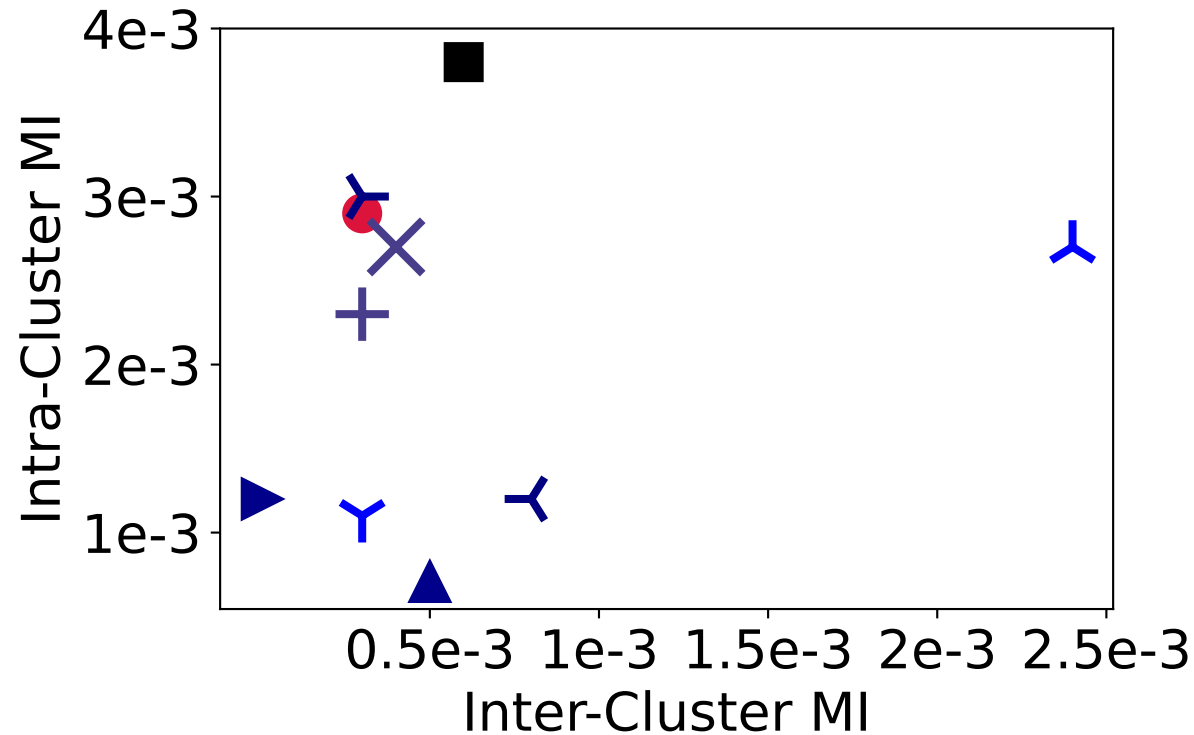

Supplement: supplementary_material [file attachment]

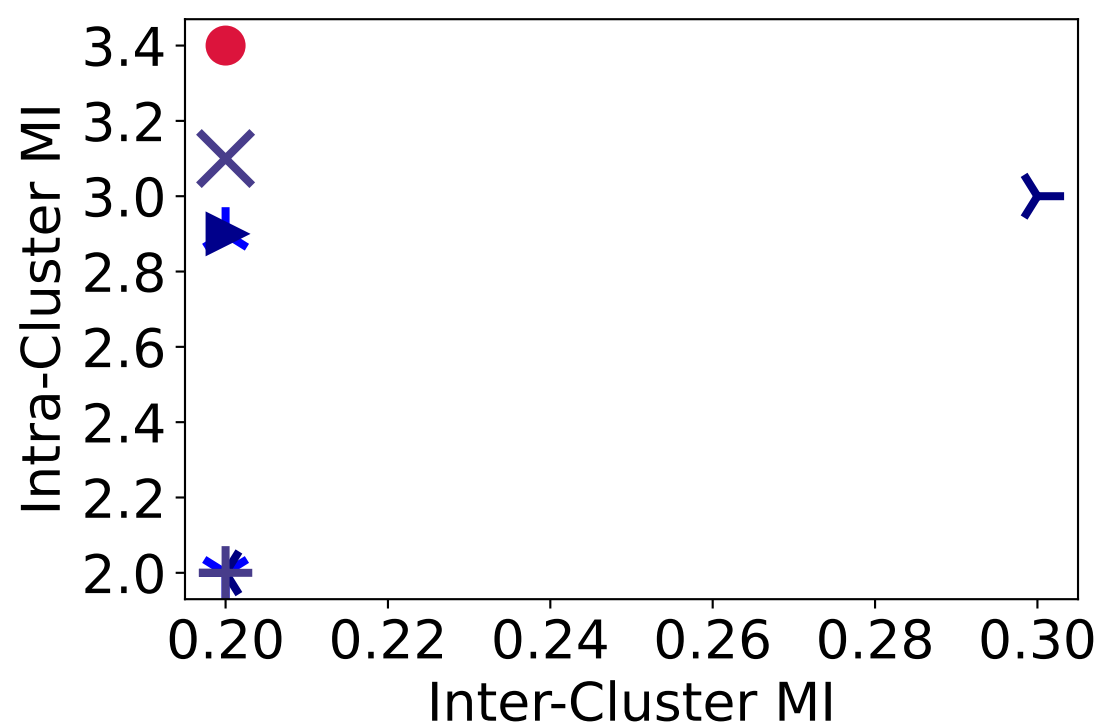

Supplement: supplementary_material [file attachment]

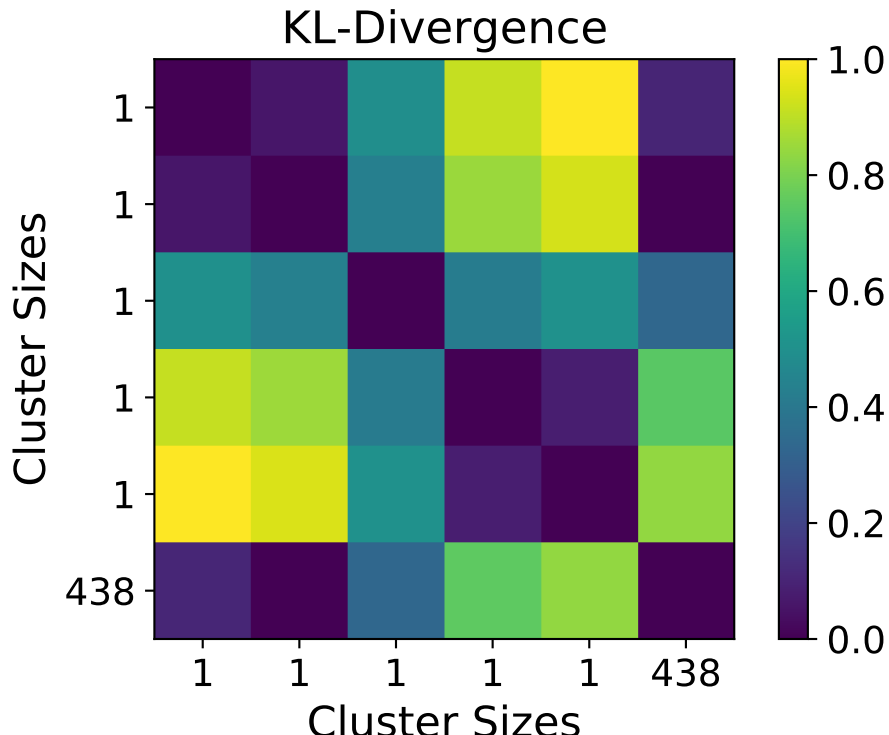

Supplement: supplementary_material [file attachment]

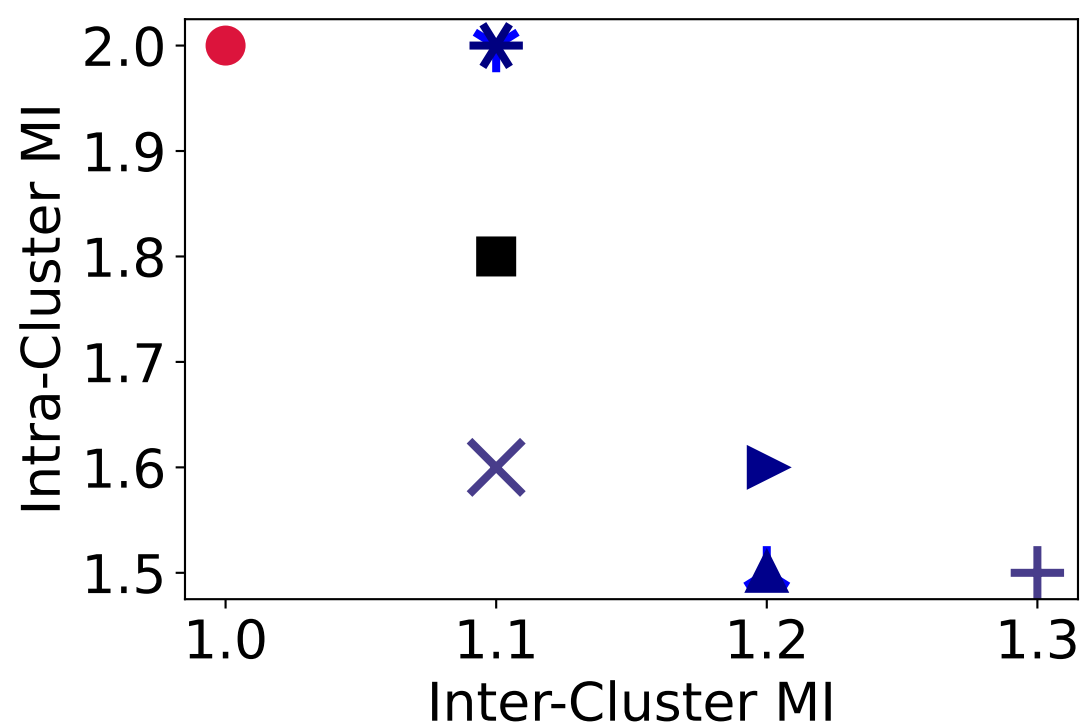

Supplement: supplementary_material [file attachment]

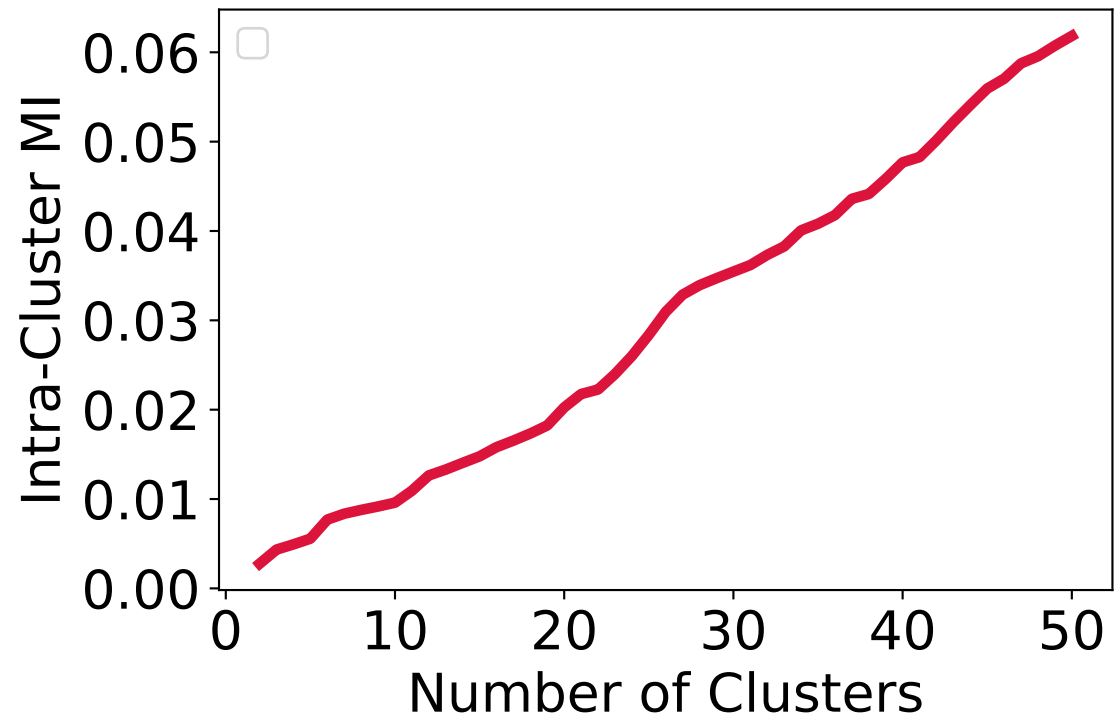

Supplement: supplementary_material [file attachment]

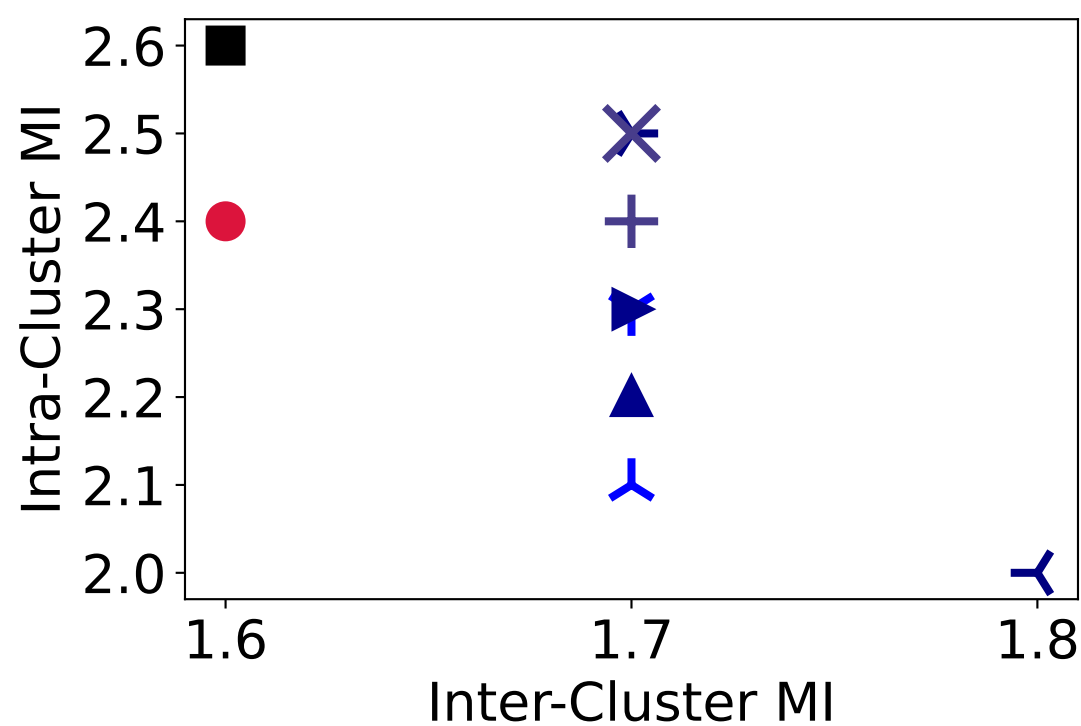

Supplement: supplementary_material [file attachment]
